# Supplementary material for: Photoluminescence quenching of inorganic cesium lead halides perovskite quantum dots (CsPbX3) by electron/hole acceptor
Source: Royal Society of Chemistry journal article supplement (doi:10.1039/c6cp04083g), 2016-11-17
Supplement: c6cp04083g1.pdf [file c6cp04083g1.pdf]

## PHYSCHEMCHEMPLYS

### Supporting Information

#### **Photoluminescence Quenching of Inorganic Cesium Lead Halides Perovskite Quantum Dots (CsPbX<sub>3</sub>) by Electron / hole Acceptor**

Yan-Xia Zhang,<sup>[a]</sup> Hai-Yu Wang,<sup>\*[a]</sup> Zhen-Yu Zhang,<sup>[a]</sup> Yu Zhang,<sup>[a]</sup> Chun Sun,<sup>[a]</sup>

Yuan-Yuan Yue,<sup>[a]</sup> Lei Wang,<sup>[a]</sup> Qi-Dai Chen,<sup>[a]</sup> and Hong-Bo Sun<sup>\*[a]</sup>

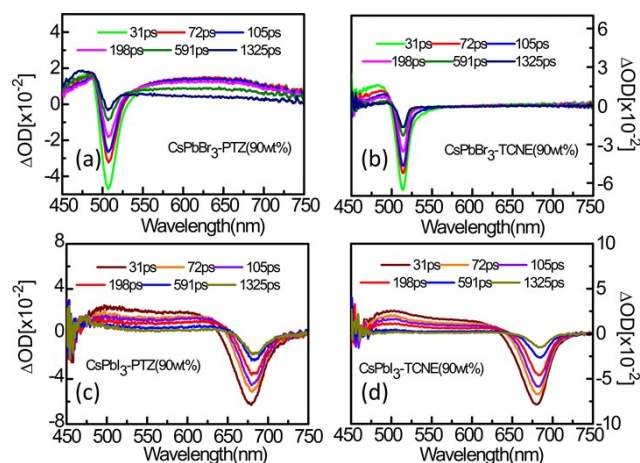

**Figure S1** Time-resolved TA spectra of CsPbBr<sub>3</sub> QDs adsorbed with 90% PTZ (a) and CsPbBr<sub>3</sub> adsorbed with 90% TCNE (b). Time-resolved transient absorption spectra of CsPbI<sub>3</sub> adsorbed with 90% PTZ (c) and CsPbI<sub>3</sub> adsorbed with 90% TCNE (d). The time-resolved transient absorption spectra were obtained at different probe delay times following 400 nm laser excitation with an energy density of 4.5  $\mu\text{J}/\text{cm}^2$ .

| sample                           | $\tau_1/\text{ps}$ | $\tau_2/\text{ps}$ | $\tau_3/\text{ps}$ | $\tau_{\text{ave}}/\text{ps}$ |
|----------------------------------|--------------------|--------------------|--------------------|-------------------------------|
| CsPbBr <sub>3</sub>              | 55(56.7%)          | 220(16.47%)        | 4500(26.83%)       | 1281.55                       |
| CsPbBr <sub>3</sub> -PTZ(55wt%)  | 48(41.75%)         | 208.88(32.1%)      | 2426.55(26.15%)    | 721.63                        |
| CsPbBr <sub>3</sub> -PTZ(90wt%)  | 20.59(34.92%)      | 104.32(45.62%)     | 1198.96(19.46%)    | 287.95                        |
| CsPbBr <sub>3</sub> -TCNE(55wt%) | 40(55.6%)          | 200(21.32%)        | 3200(23.08%)       | 803.44                        |
| CsPbBr <sub>3</sub> -TCNE(90wt%) | 45.73(44.67%)      | 103.07(23.7%)      | 700(31.63%)        | 266.26                        |
| CsPbI <sub>3</sub>               | 92(42.27%)         | 500(33.23%)        | 6700(25.50%)       | 1877.92                       |
| CsPbI <sub>3</sub> -PTZ(55wt%)   | 70(31.95%)         | 350(43.38%)        | 6000(24.67%)       | 1654.39                       |
| CsPbI <sub>3</sub> -PTZ(90wt%)   | 78.55(46.17%)      | 460.46(30.77%)     | 4637.64(23.06%)    | 1247.24                       |
| CsPbI <sub>3</sub> -TCNE(55wt%)  | 42.85(58.84%)      | 270(21.53%)        | 6000(19.63%)       | 1224                          |
| CsPbI <sub>3</sub> -TCNE(90wt%)  | 75(33.16%)         | 390(48.61%)        | 5300(18.14%)       | 1165                          |

**Table S1** Best-fit parameters of absorption bleach transients

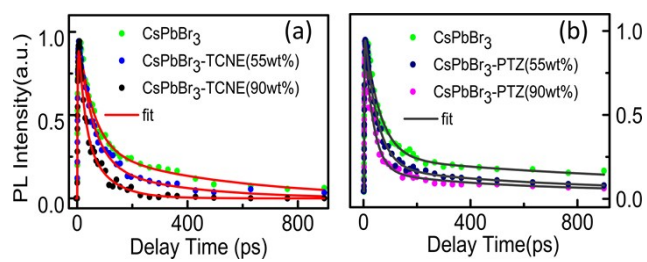

**Figure S2** (a) Femtosecond time-resolved TA dynamics of CsPbBr<sub>3</sub> QDs, CsPbBr<sub>3</sub>-TCNE (55wt %) and CsPbBr<sub>3</sub>-TCNE (90wt %). (b) Femtosecond time-resolved TA dynamics of the CsPbBr<sub>3</sub> QDs, CsPbBr<sub>3</sub>-PTZ (55wt %) and CsPbBr<sub>3</sub>-PTZ (90wt %) (Probed at 515 nm) at 400 nm excitation.

| Sample                           | $\tau_{ave}/ps$ |
|----------------------------------|-----------------|
| CsPbBr <sub>3</sub>              | 432             |
| CsPbBr <sub>3</sub> -TCNE(55wt%) | 150.42          |
| CsPbBr <sub>3</sub> -TCNE(90wt%) | 62.78           |
| CsPbBr <sub>3</sub> -PTZ(55wt%)  | 253             |
| CsPbBr <sub>3</sub> -PTZ(90wt%)  | 110.54          |

**Table S2.** Multiexponential Fitting for Femtosecond Time Resolved Fluorescence Dynamics.
